# Supplementary material for: Synthesis and Immunological Evaluation of Mannosylated Desmuramyl Dipeptides Modified by Lipophilic Triazole Substituents
Source: MDPI journal article supplement (doi:10.3390/ijms23158628), 2022-08-03
Supplement: s1 [file s1]

## Supporting Information

# Synthesis and Immunological Evaluation of Mannosylated Desmuramyl Dipeptides Modified by Lipophilic Triazole Substituents

Vesna Petrović Peroković <sup>1,†</sup>, Željka Car <sup>1,†</sup>, Mia Bušljeta <sup>1</sup>, Danijela Mihelec <sup>1</sup>, Marija Paurević <sup>2</sup>, Siniša Ivanković <sup>3</sup>, Ranko Stojković <sup>3,\*</sup> and Rosana Ribić <sup>4,\*</sup>

<sup>1</sup> Department of Chemistry, Faculty of Science, University of Zagreb, Horvatovac 102a, 10000 Zagreb, Croatia; vpetrovi@chem.pmf.hr (V.P.P.); zcar@chem.pmf.hr (Ž.C.); mia.busljeta@chem.pmf.hr (M.B.); danijela.mihelec@chem.pmf.hr (D.M.)

<sup>2</sup> Department of Chemistry, Josip Juraj Strossmayer University of Osijek, Cara Hadrijana 8/A, 31000 Osijek, Croatia; marija.paurevic@kemija.unios.hr

<sup>3</sup> Rud'er Bošković Institute, Bijenička cesta 54, 10000 Zagreb, Croatia; sinisa.ivankovic@irb.hr

<sup>4</sup> University Center Varaždin, University North, Jurja Križanića 31b, 42000 Varaždin, Croatia

\* Correspondence: stojkov@irb.hr (R.S.); rosana.ribic@unin.hr (R.R.); Tel.: +385-915-141-256 (R.S.); +385-4249-3306 (R.R.)

† These authors contributed equally to this work.

## 1. NMR spectra ( $^1\text{H}$ , DEPTQ)

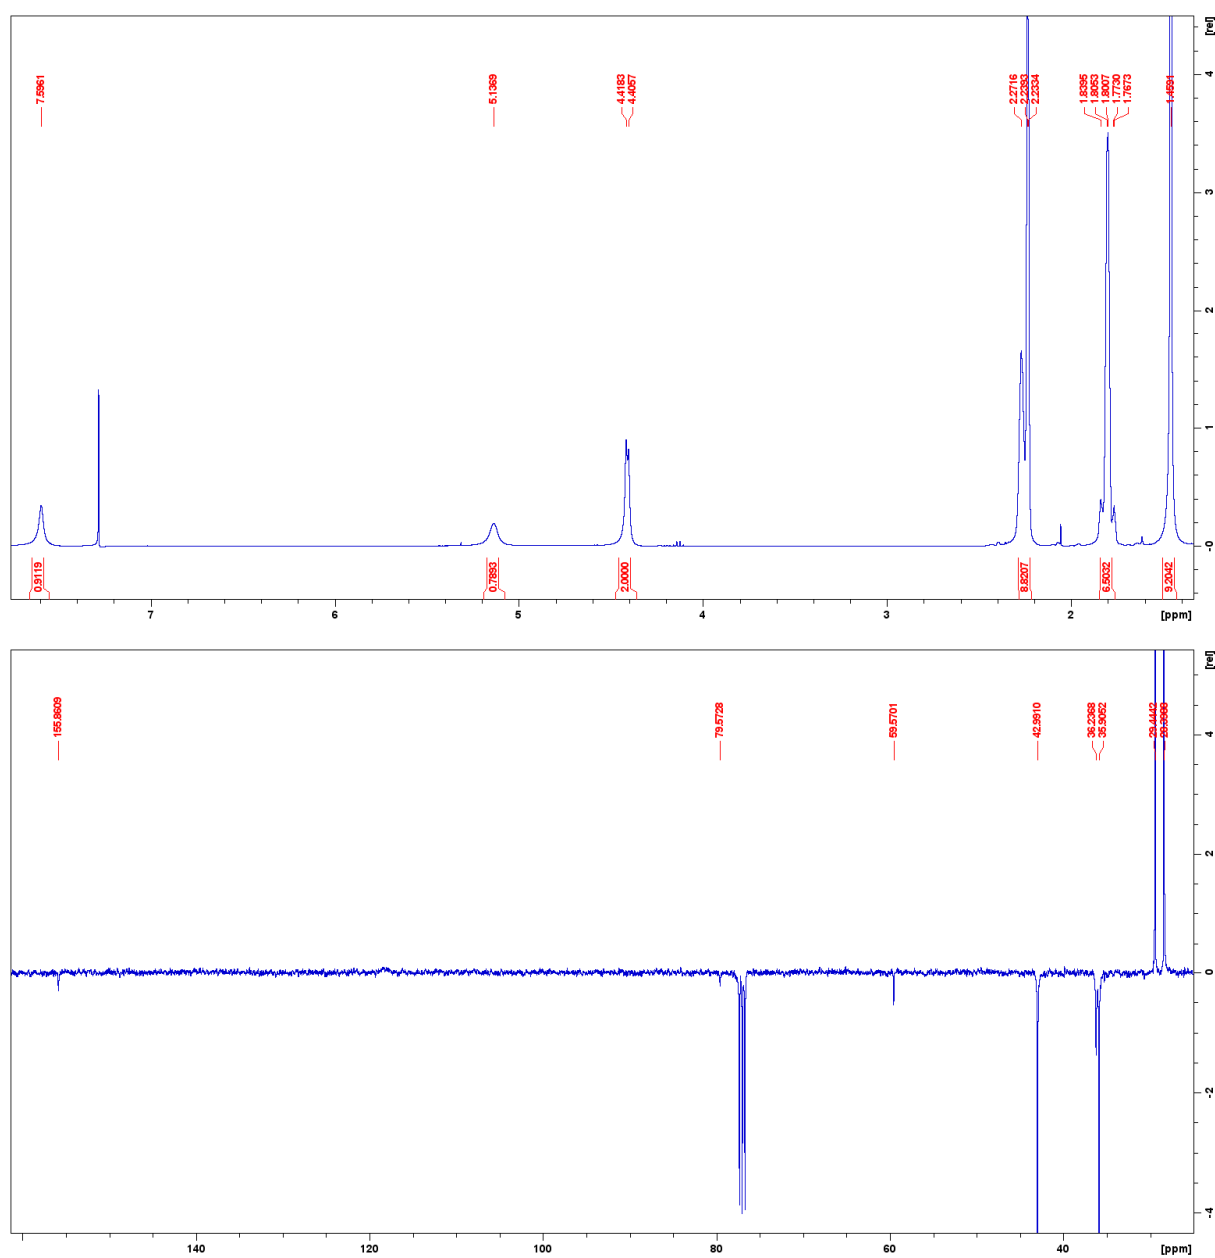

Figure S1. NMR spectra of compound **1a**

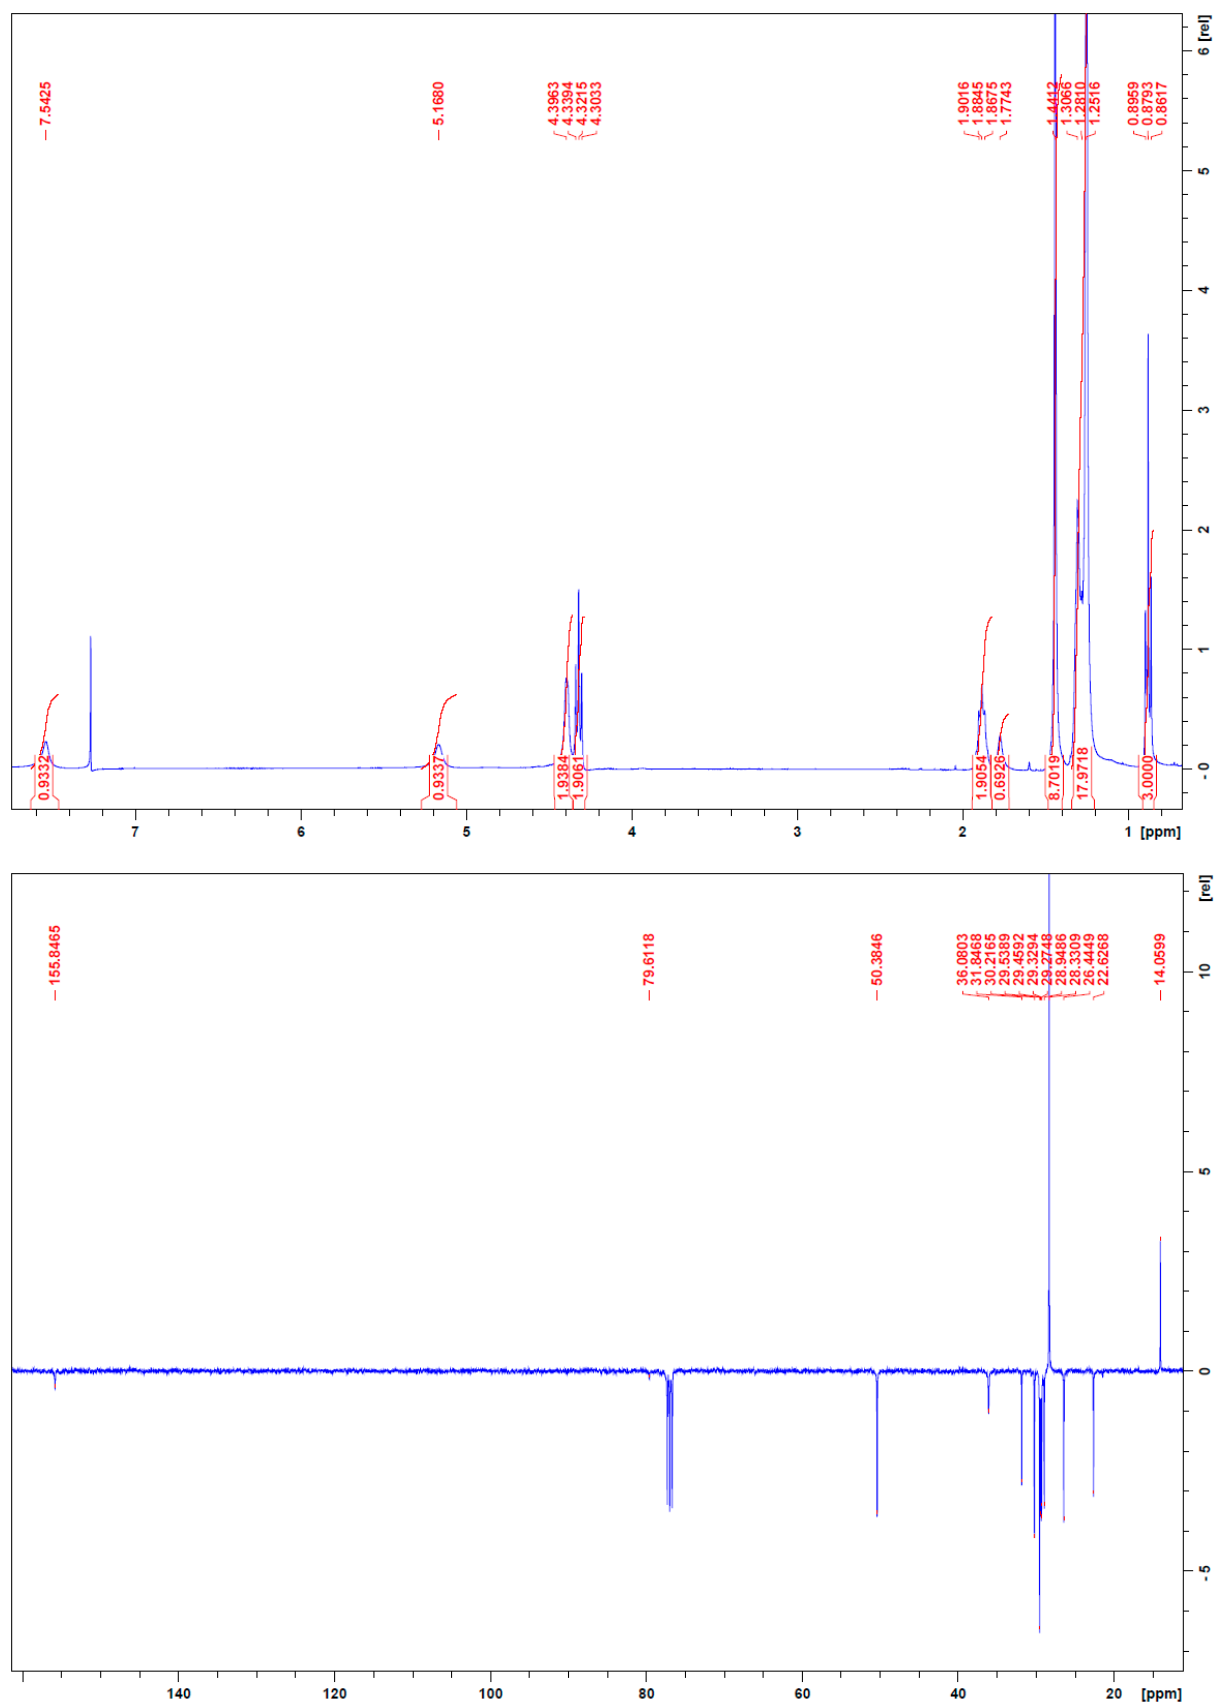

Figure S2. NMR spectra of compound **1b**

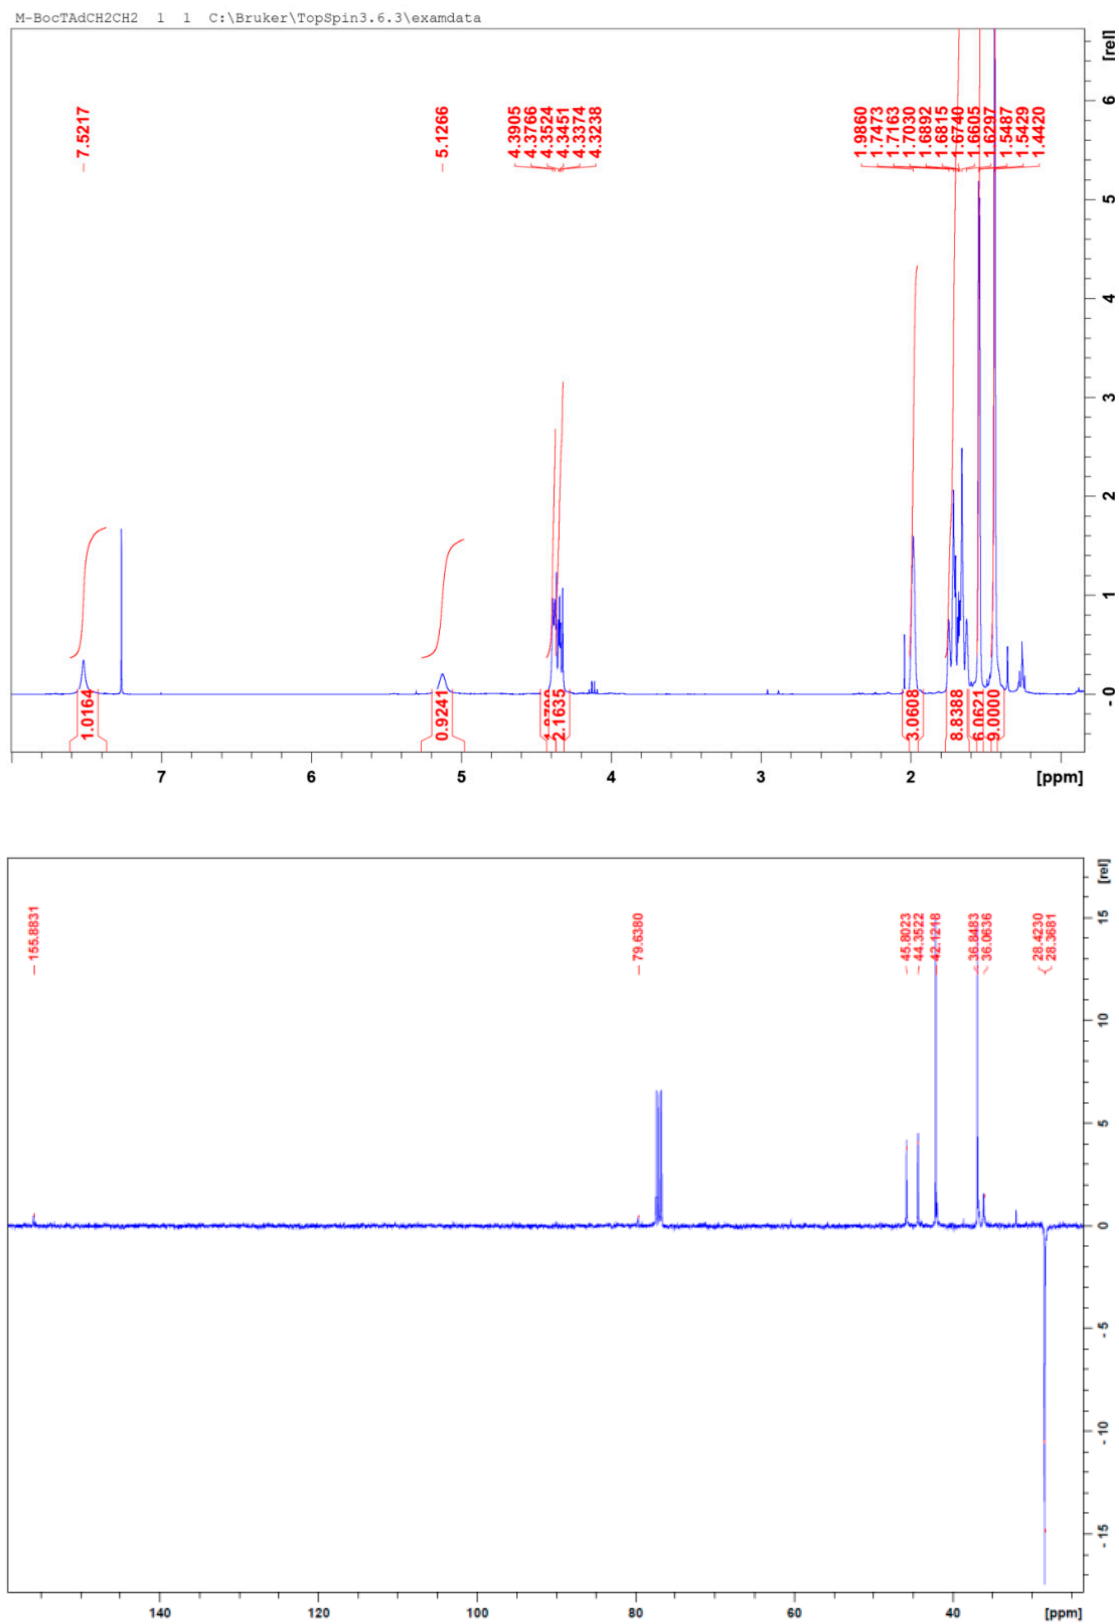

Figure S3. NMR spectra of compound **1c**

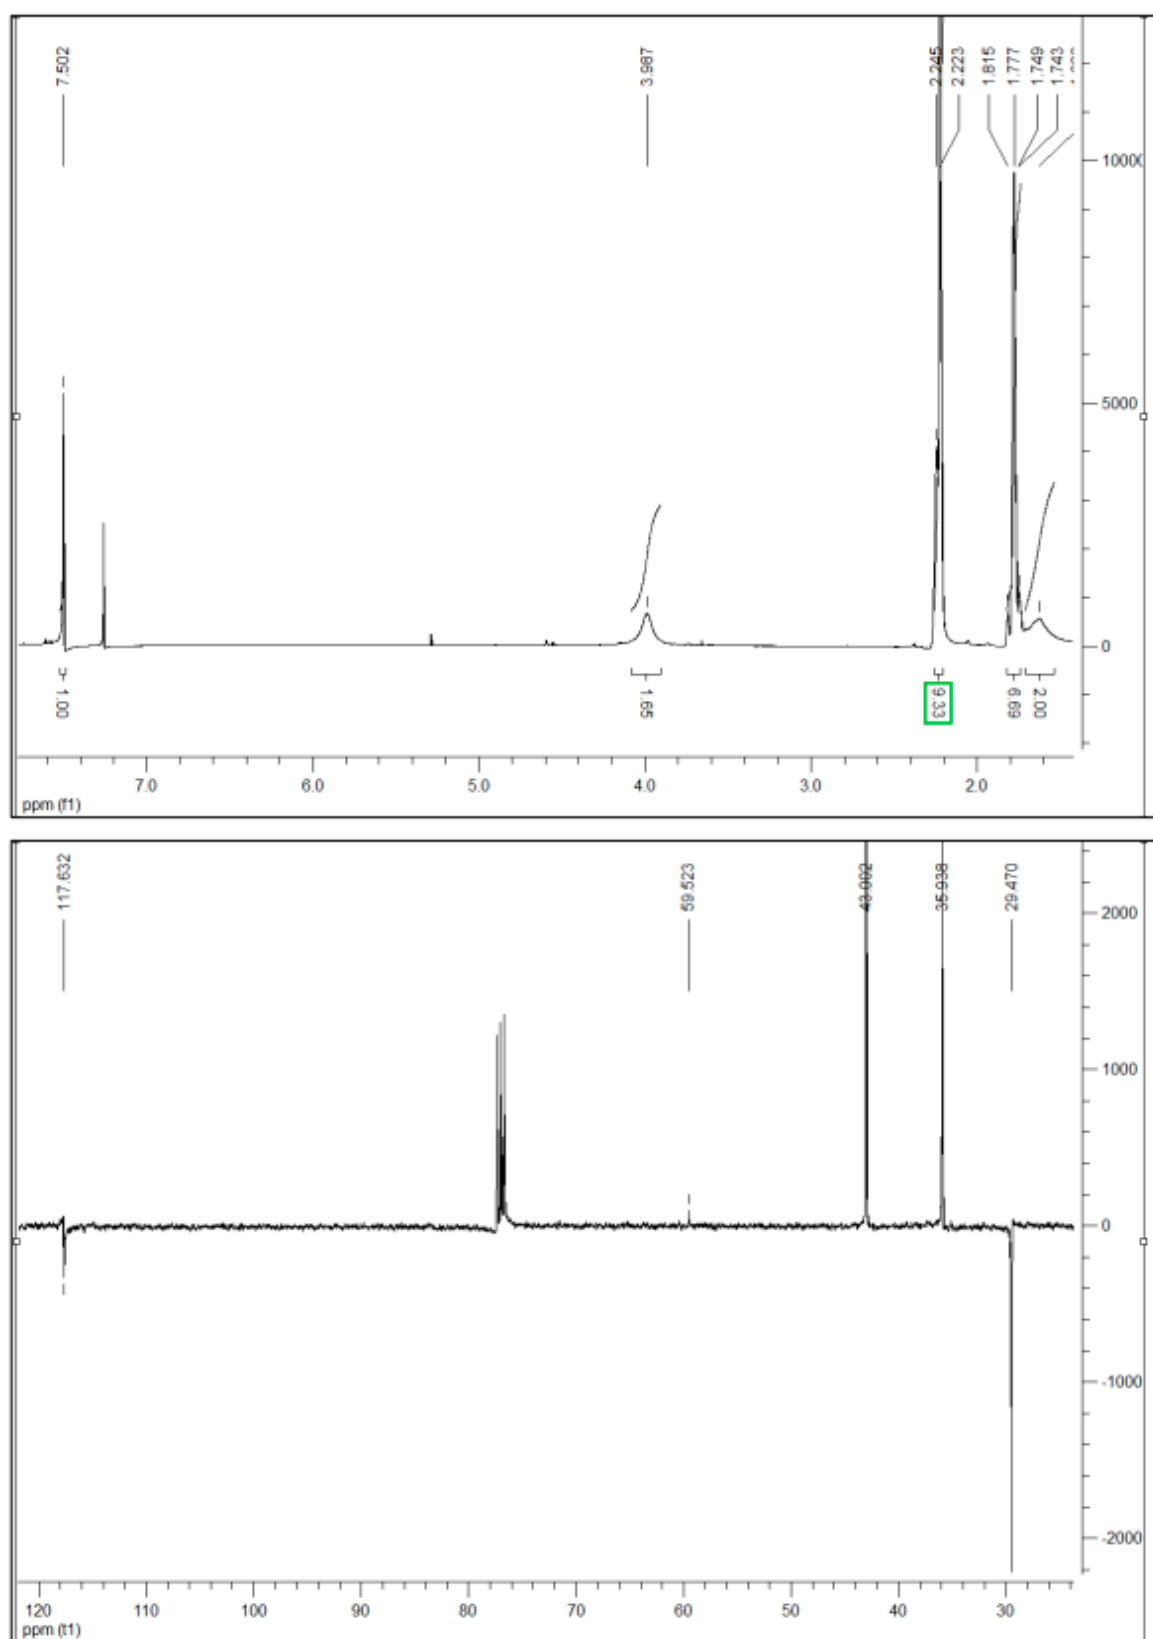

Figure S4. NMR spectra of compound 2a

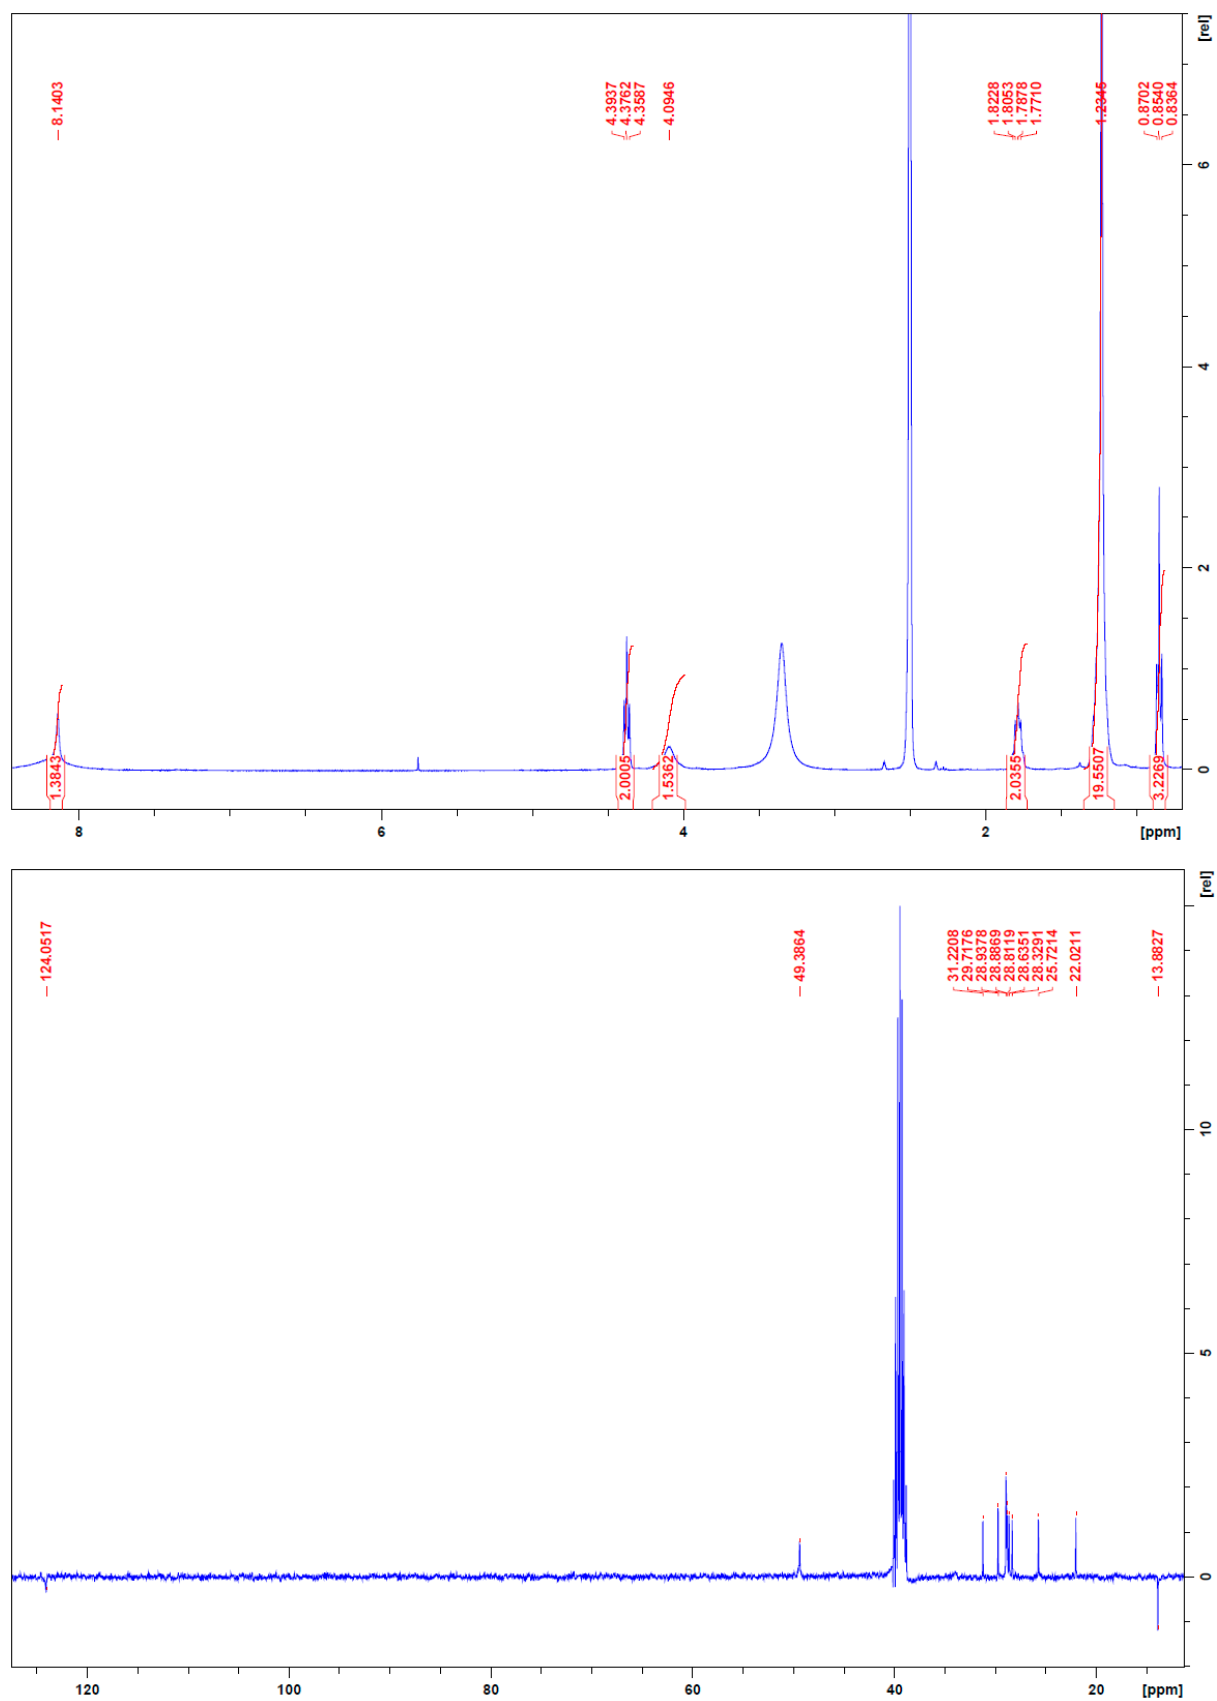

Figure S5. NMR spectra of compound **2b**

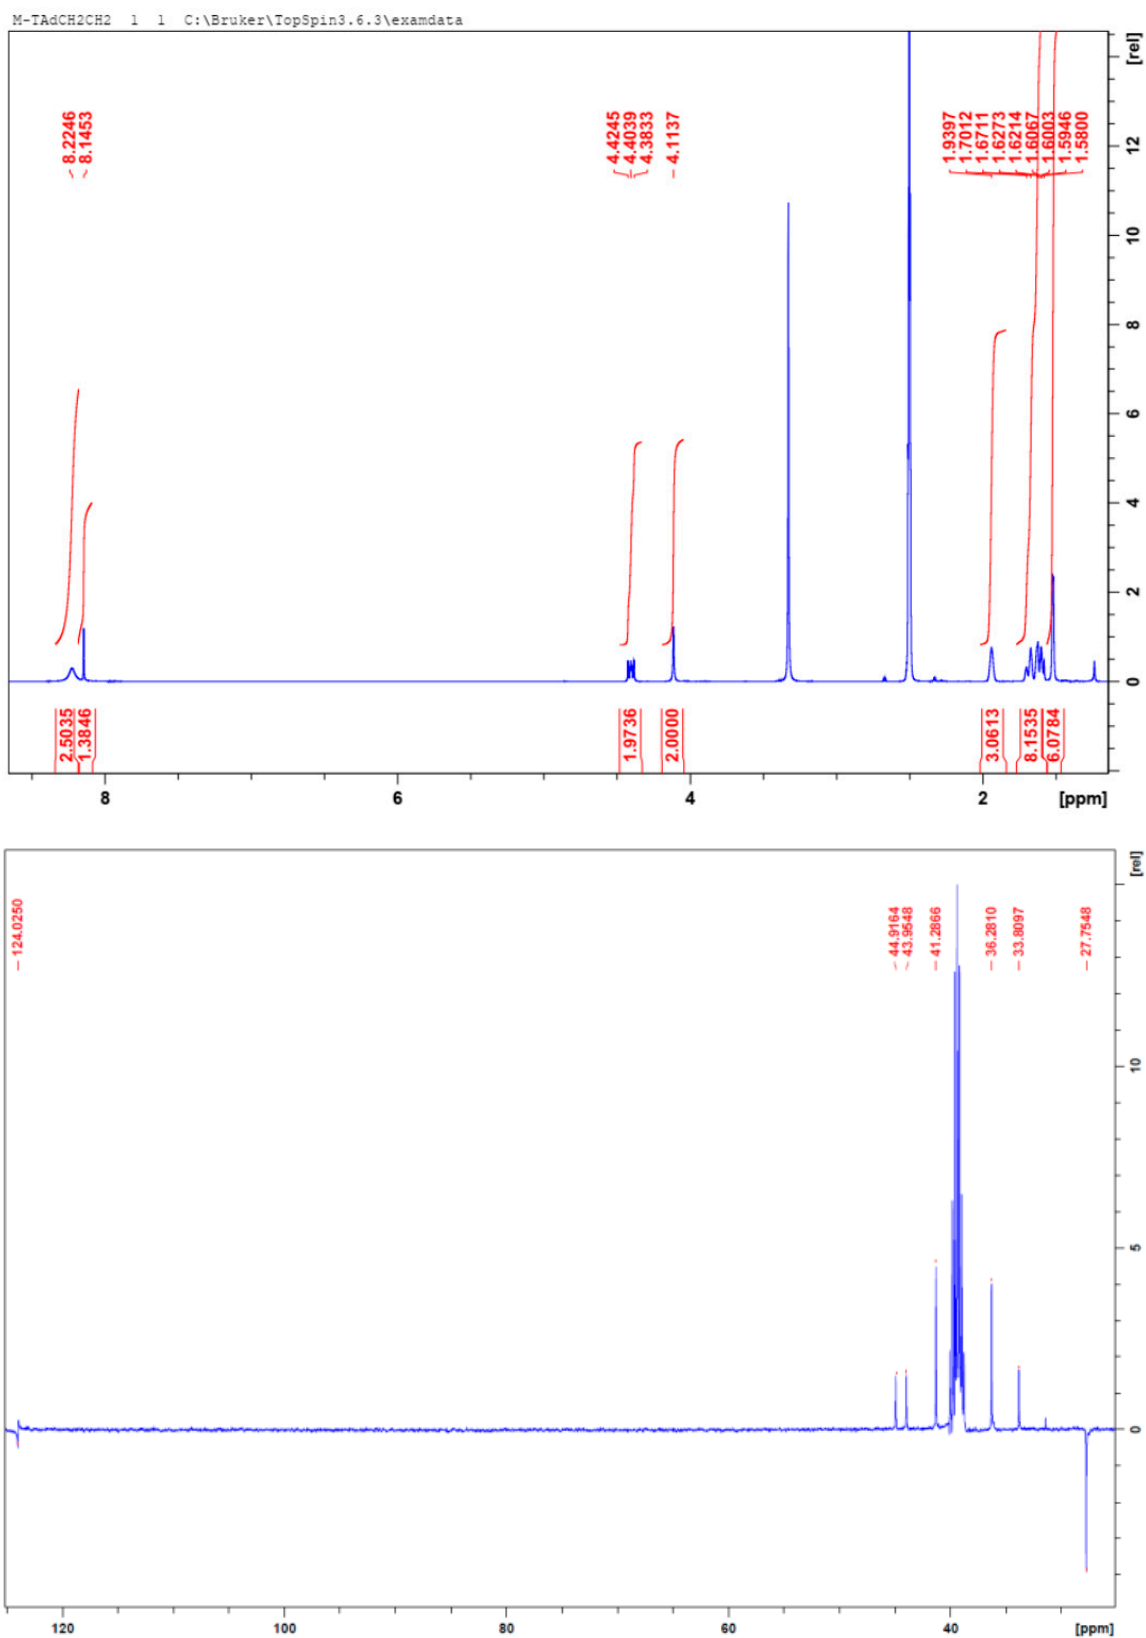

Figure S6. NMR spectra of compound **2c**

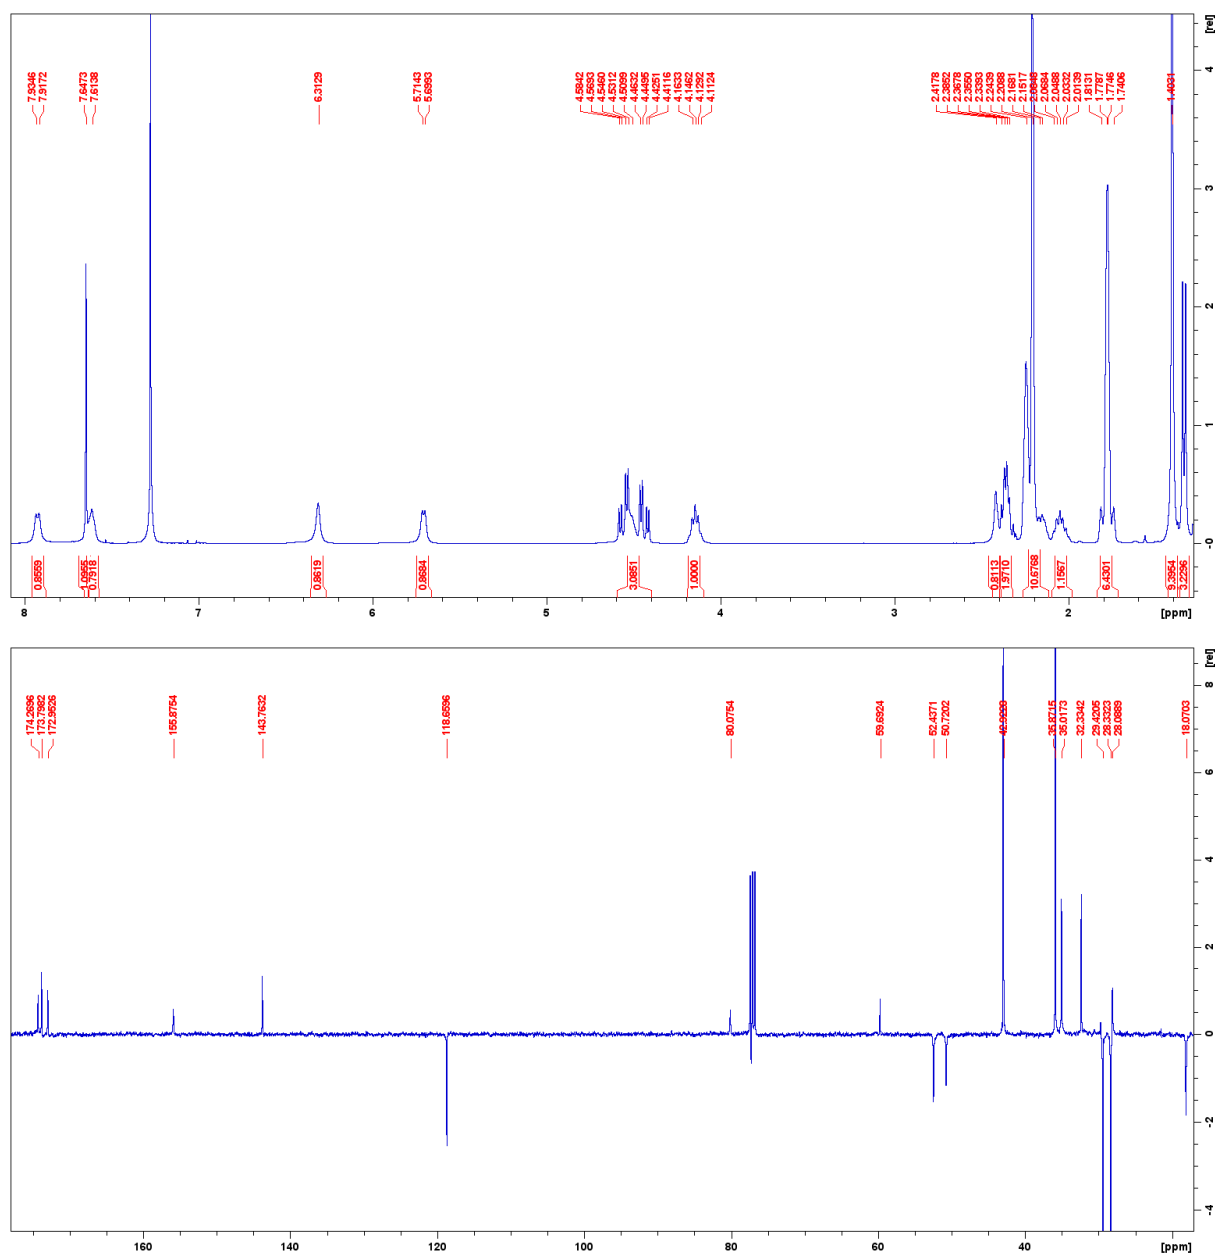

Figure S7. NMR spectra of compound 3a



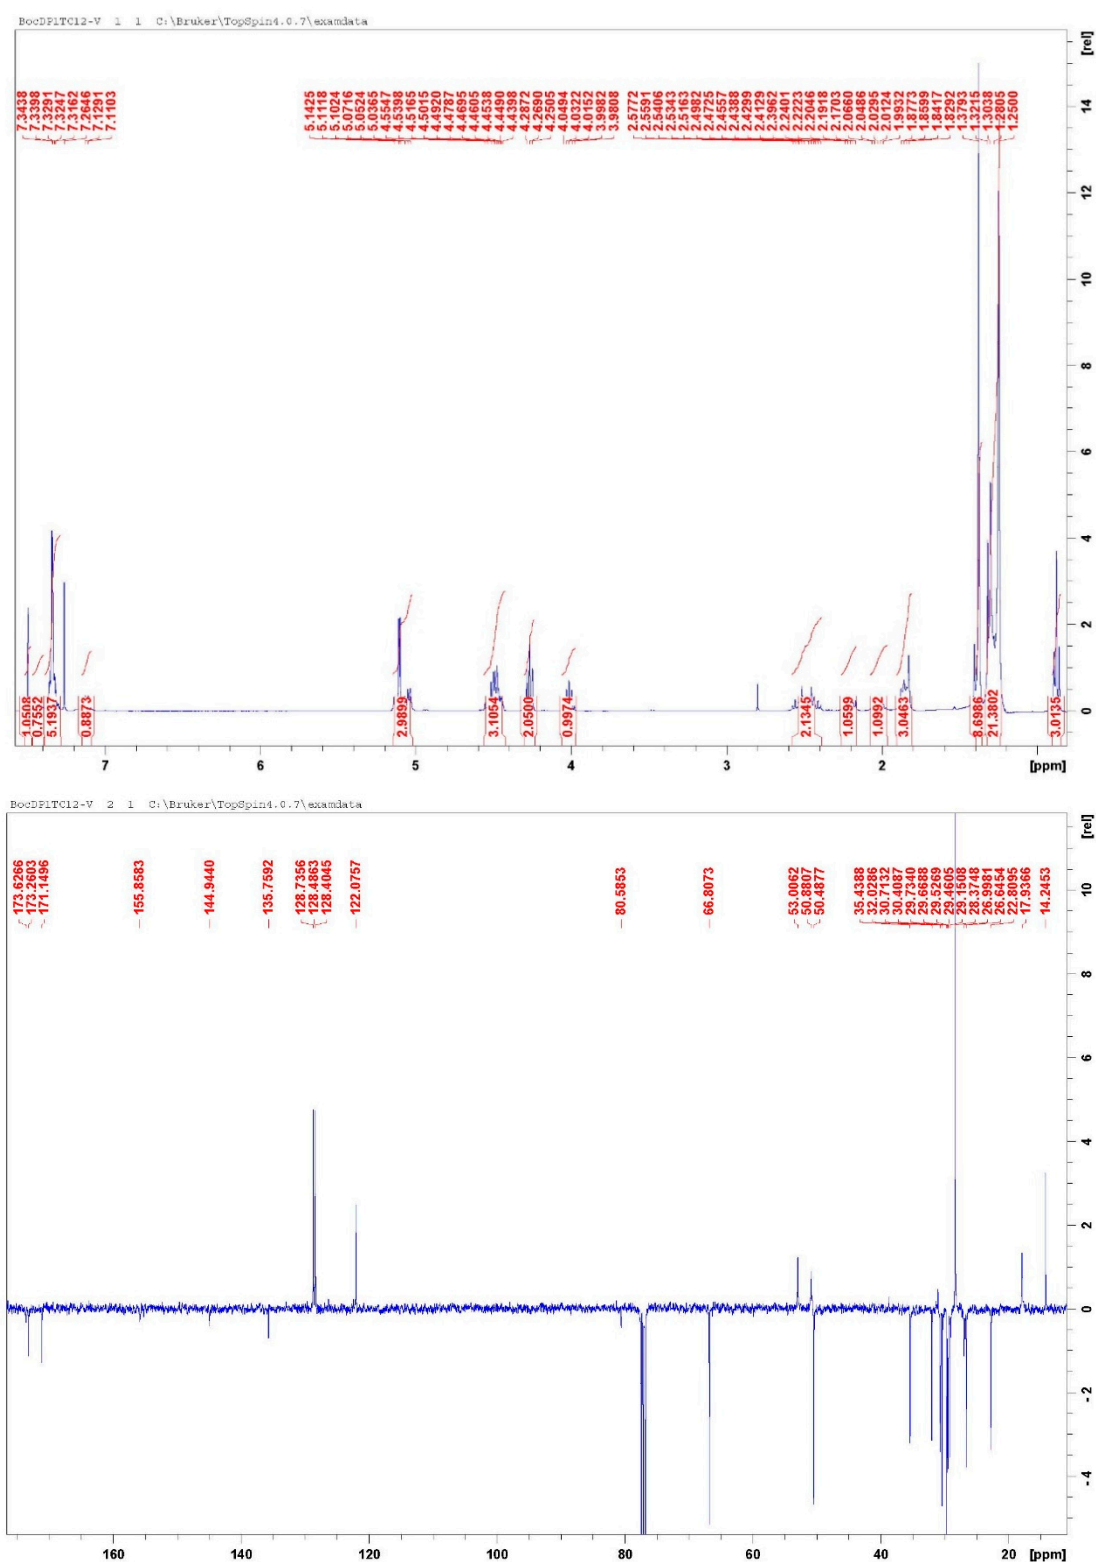

Figure S8. NMR spectra of compound 3b

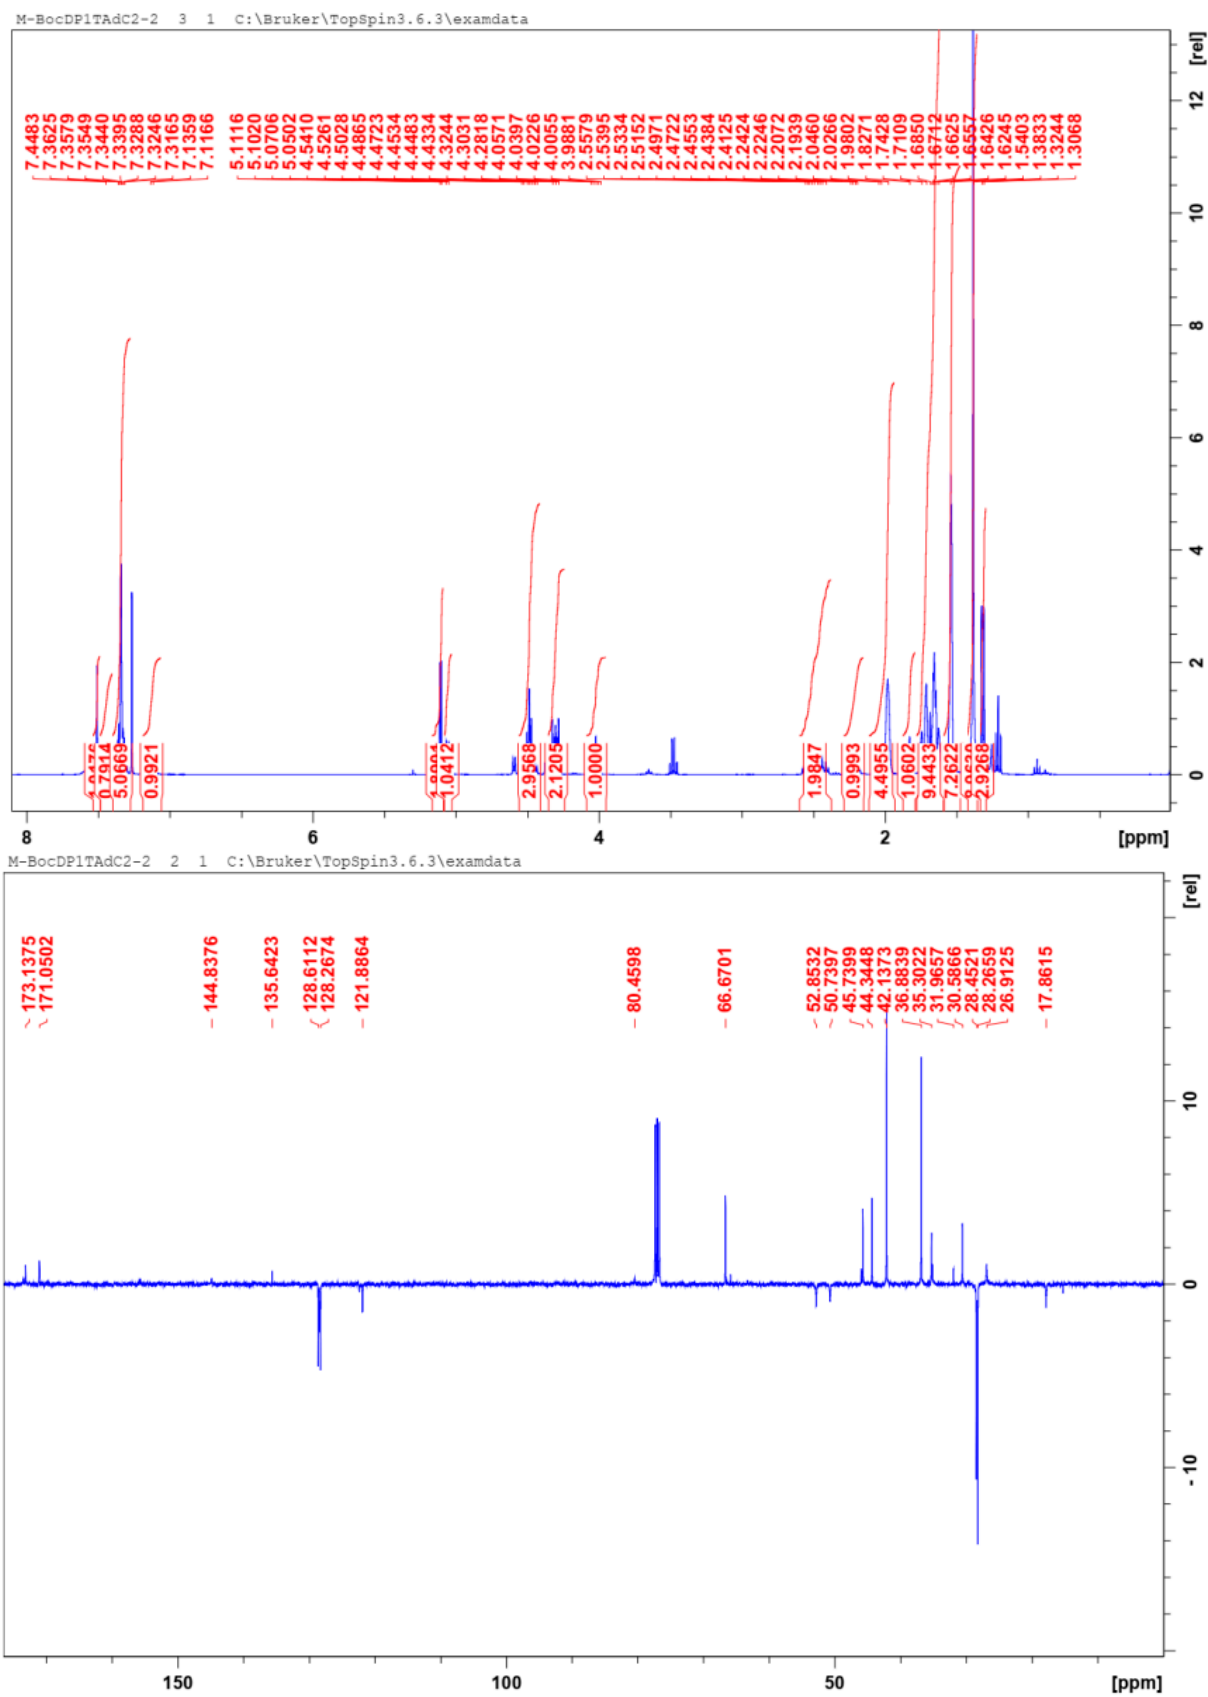

Figure S9. NMR spectra of compound 3c

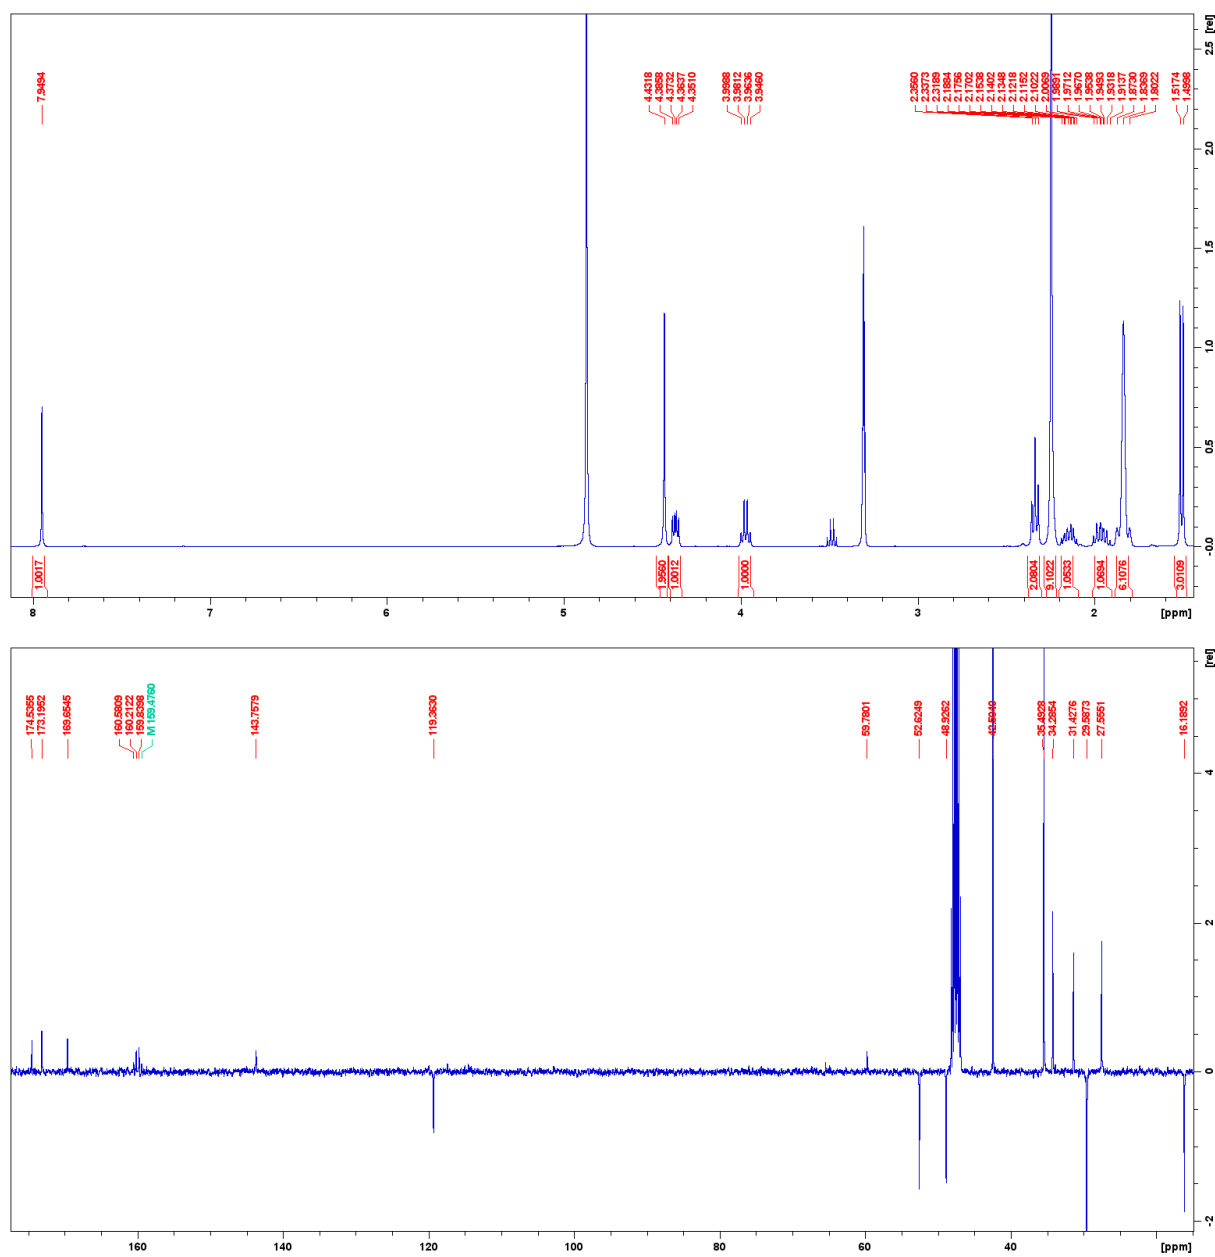

Figure S10. NMR spectra of compound **4a**

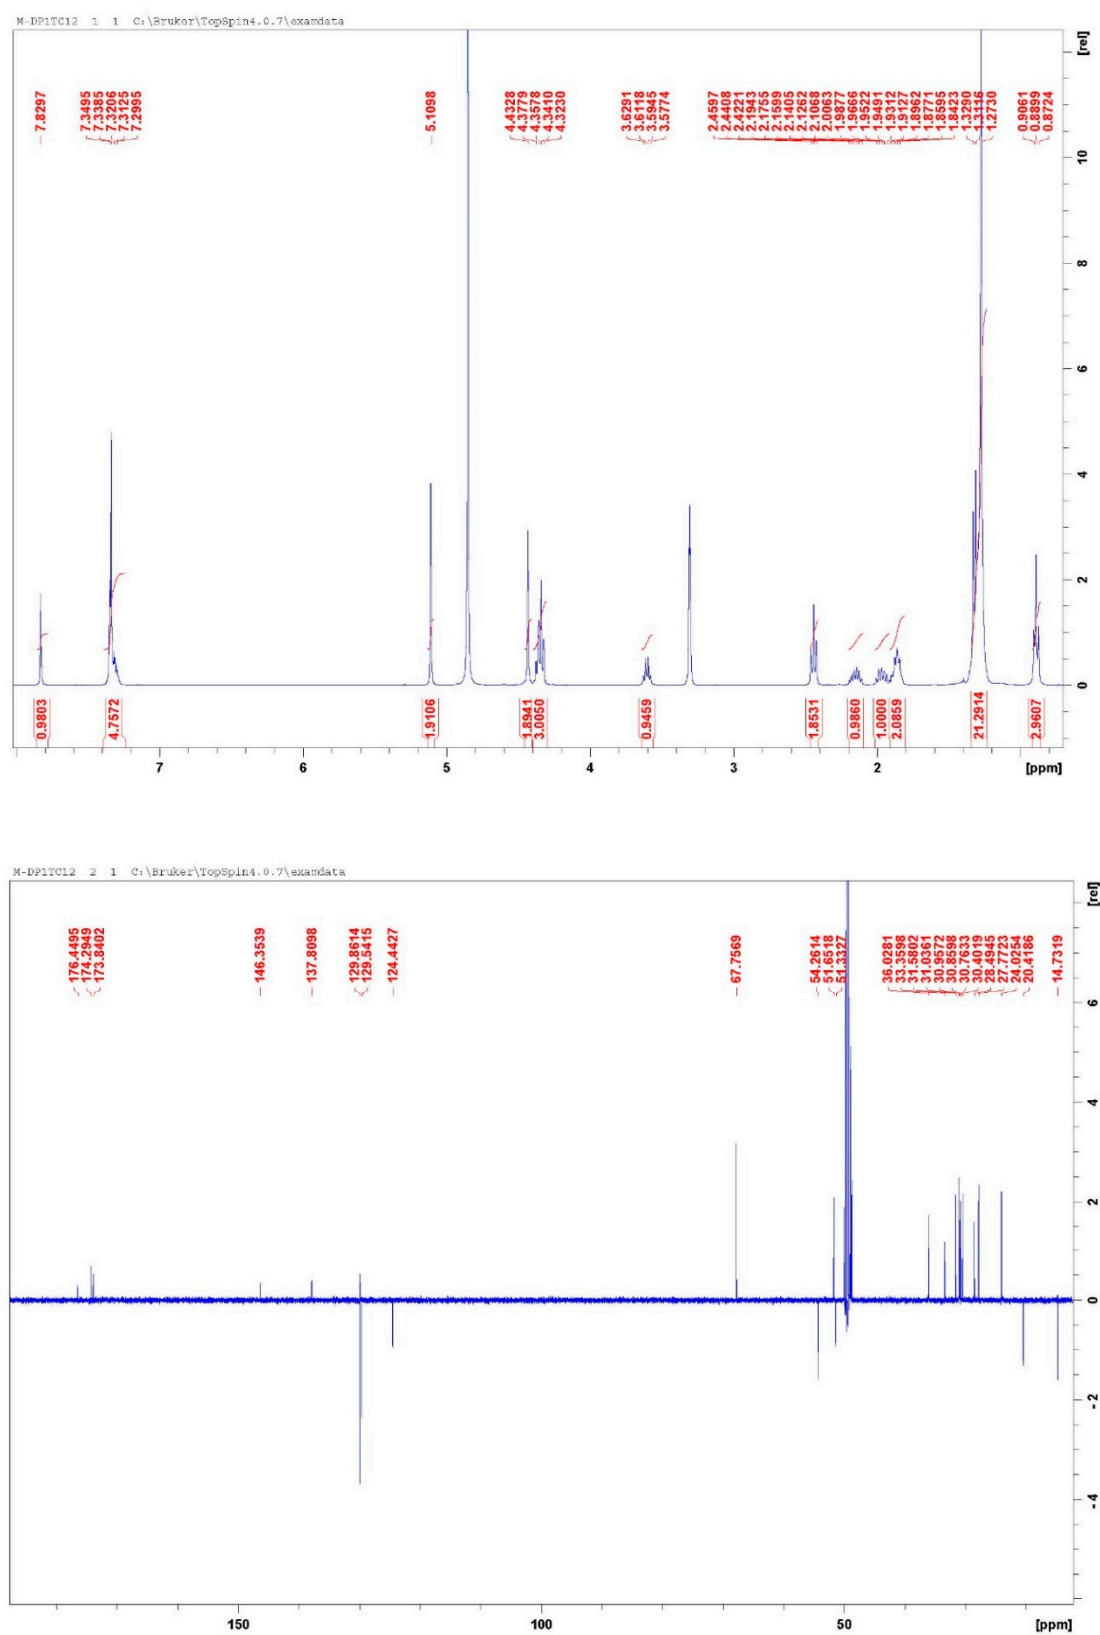

Figure S11. NMR spectra of compound **4b**

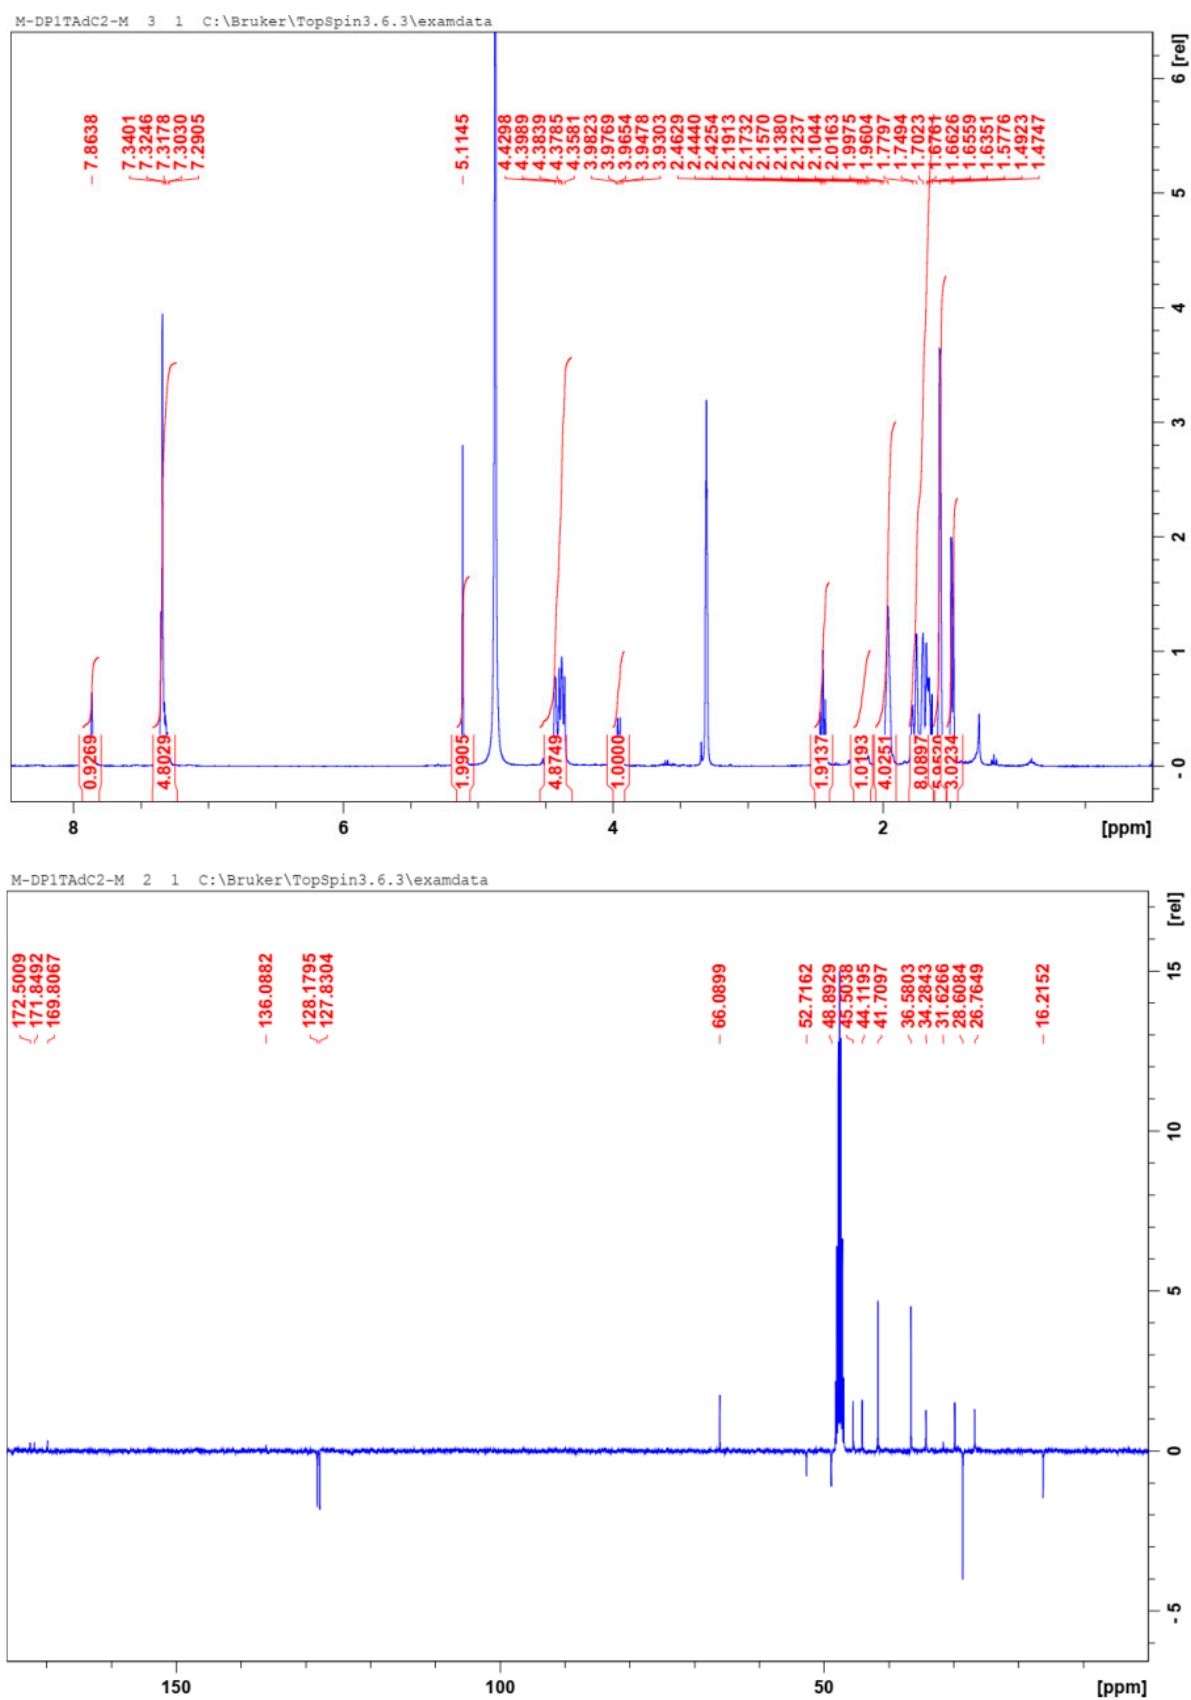

Figure S12. NMR spectra of compound **4c**

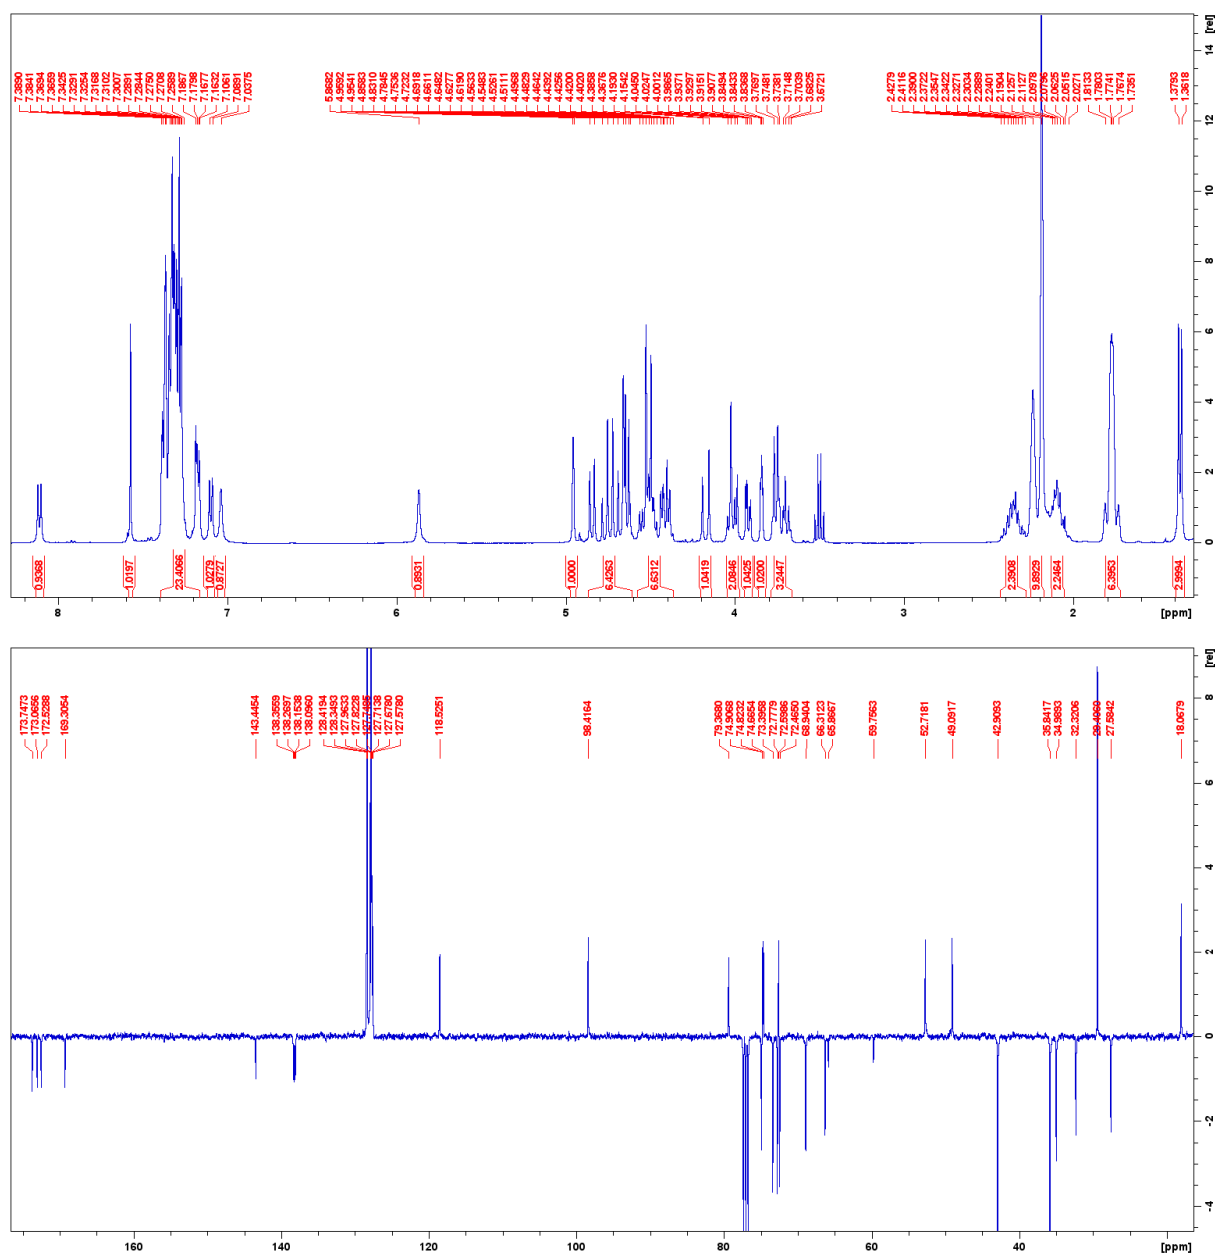

Figure S13. NMR spectra of compound 5a

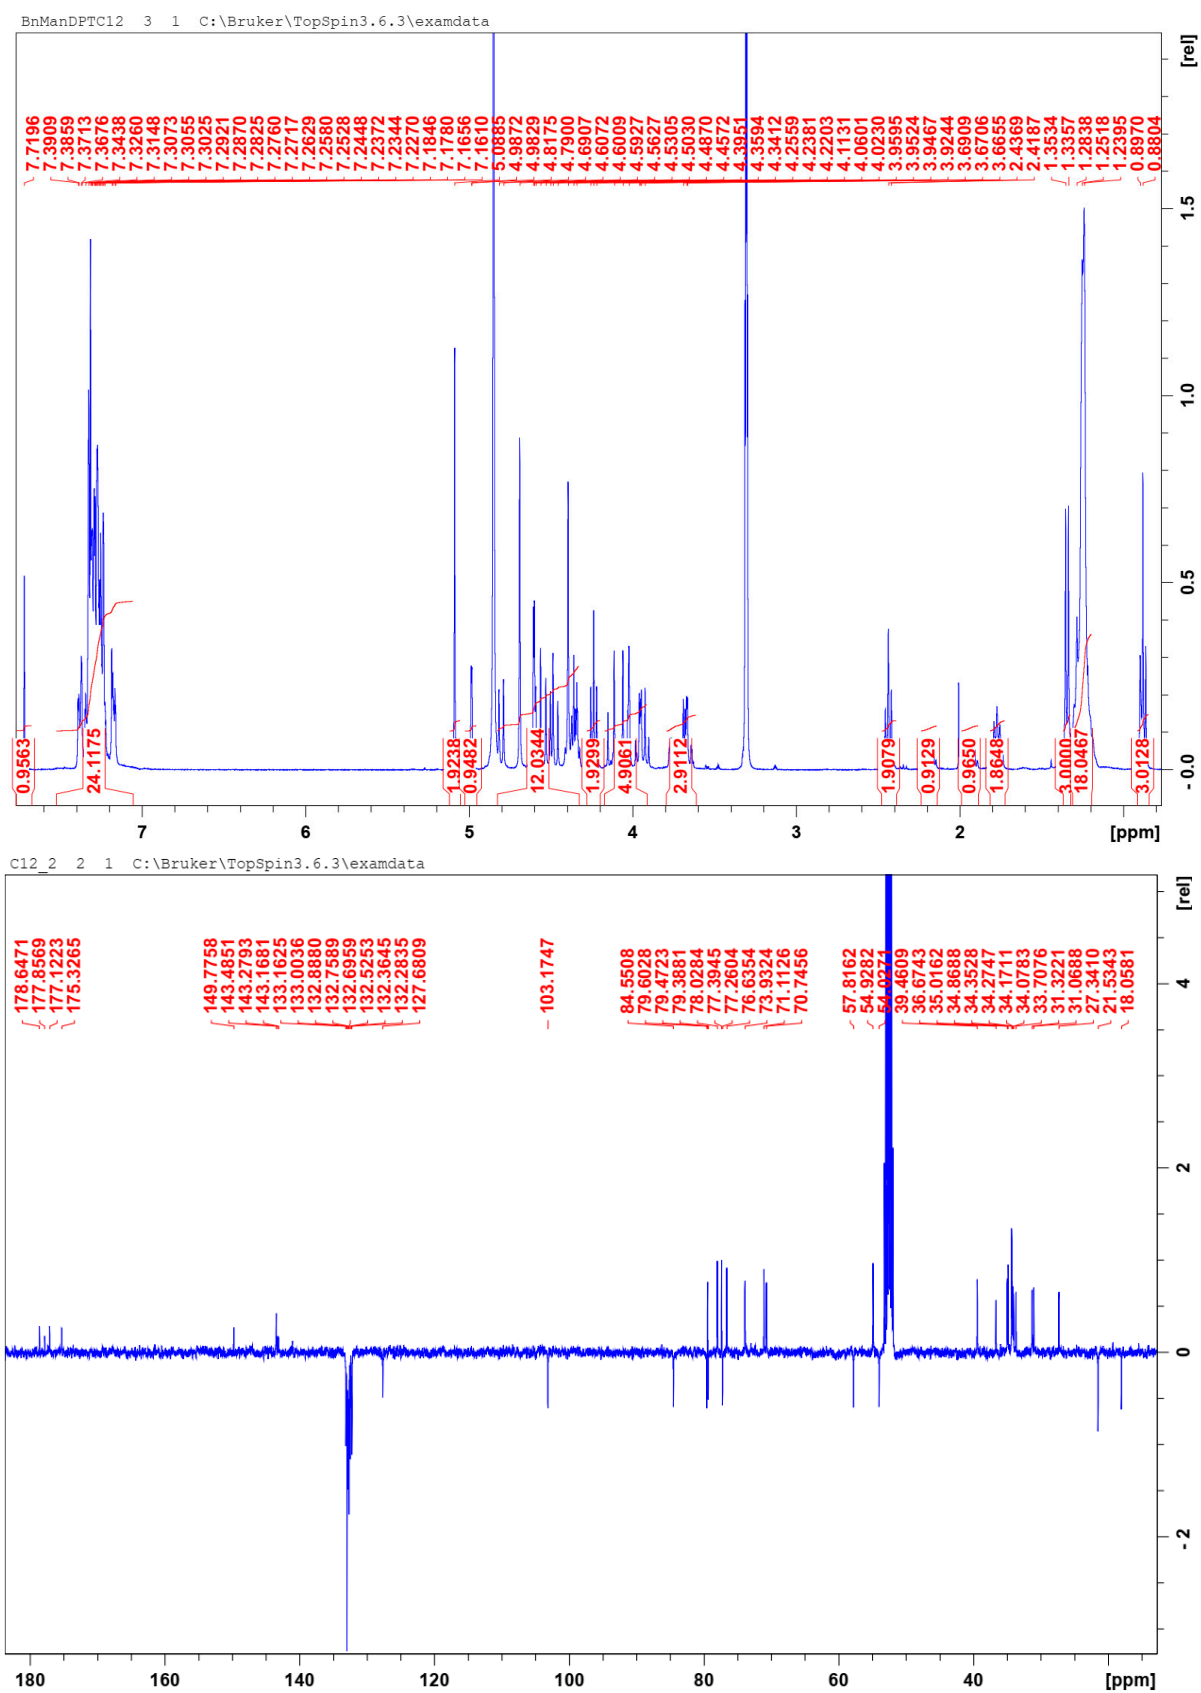

Figure S14. NMR spectra of compound **5b**

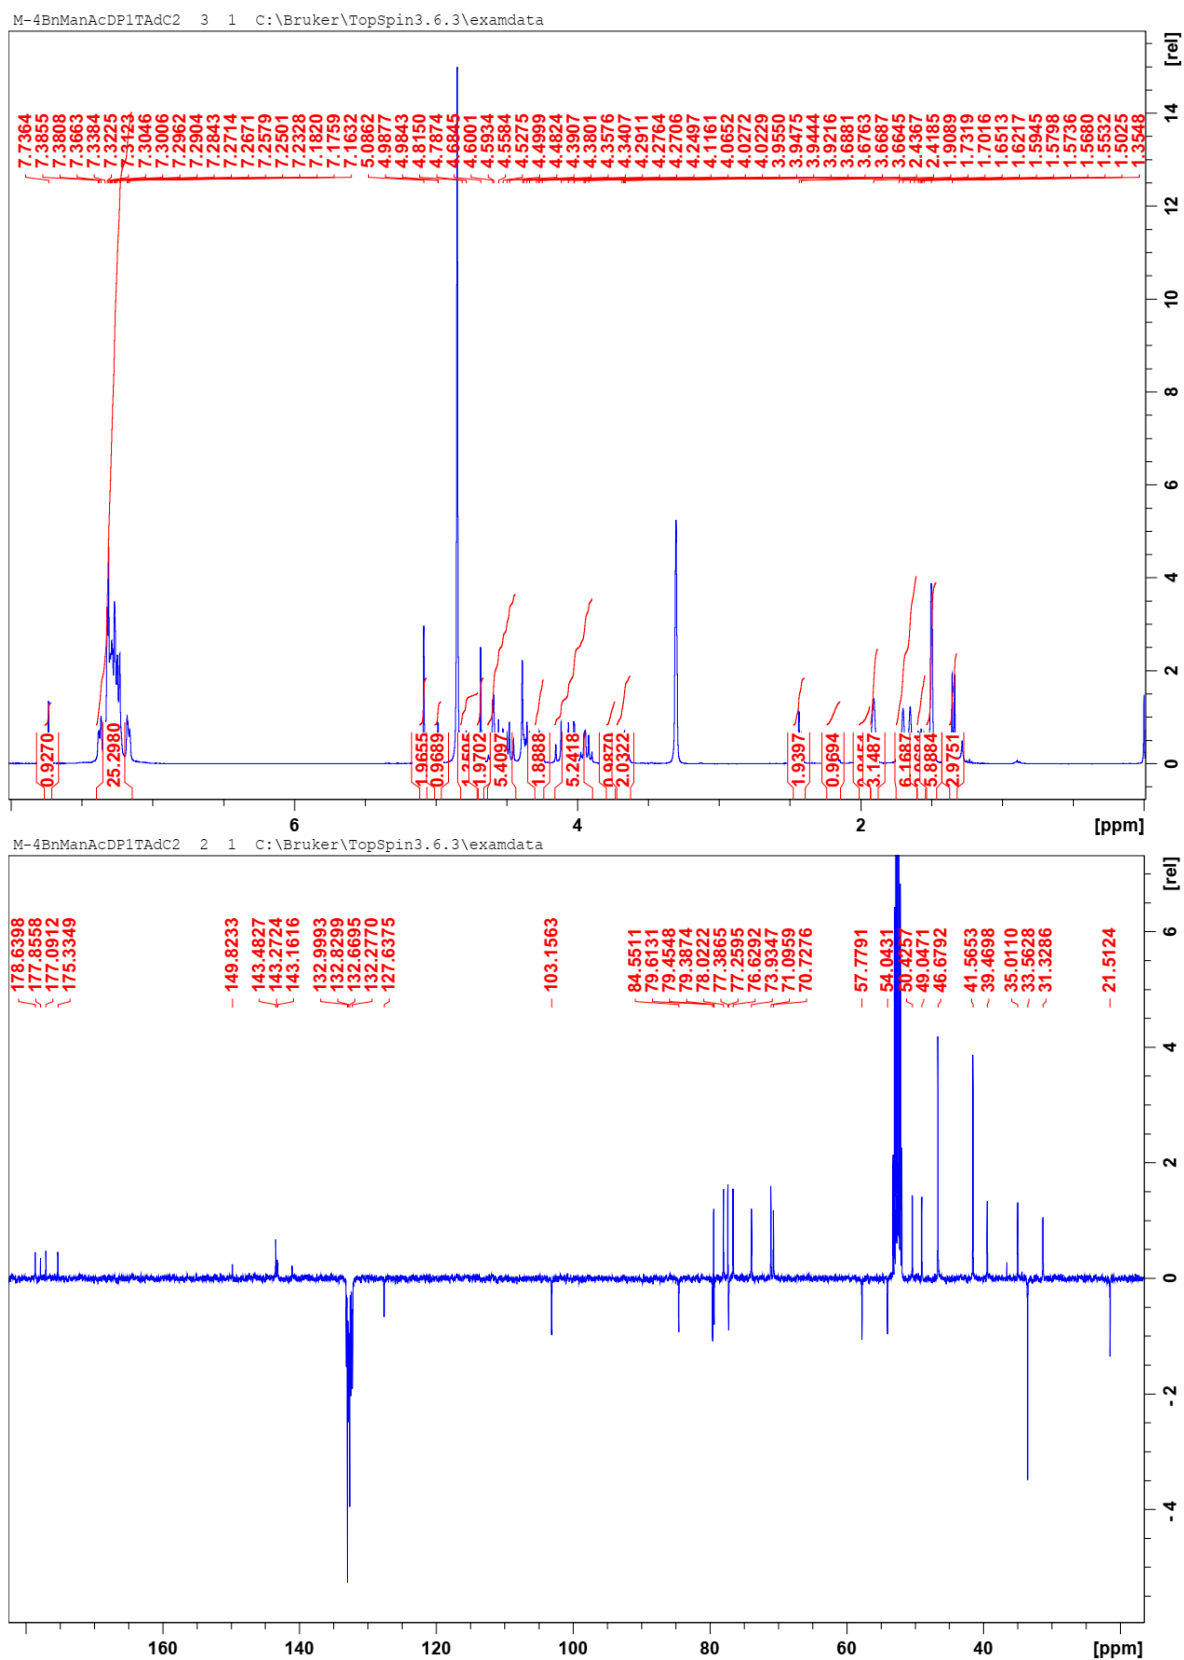

Figure S15. NMR spectra of compound 5c



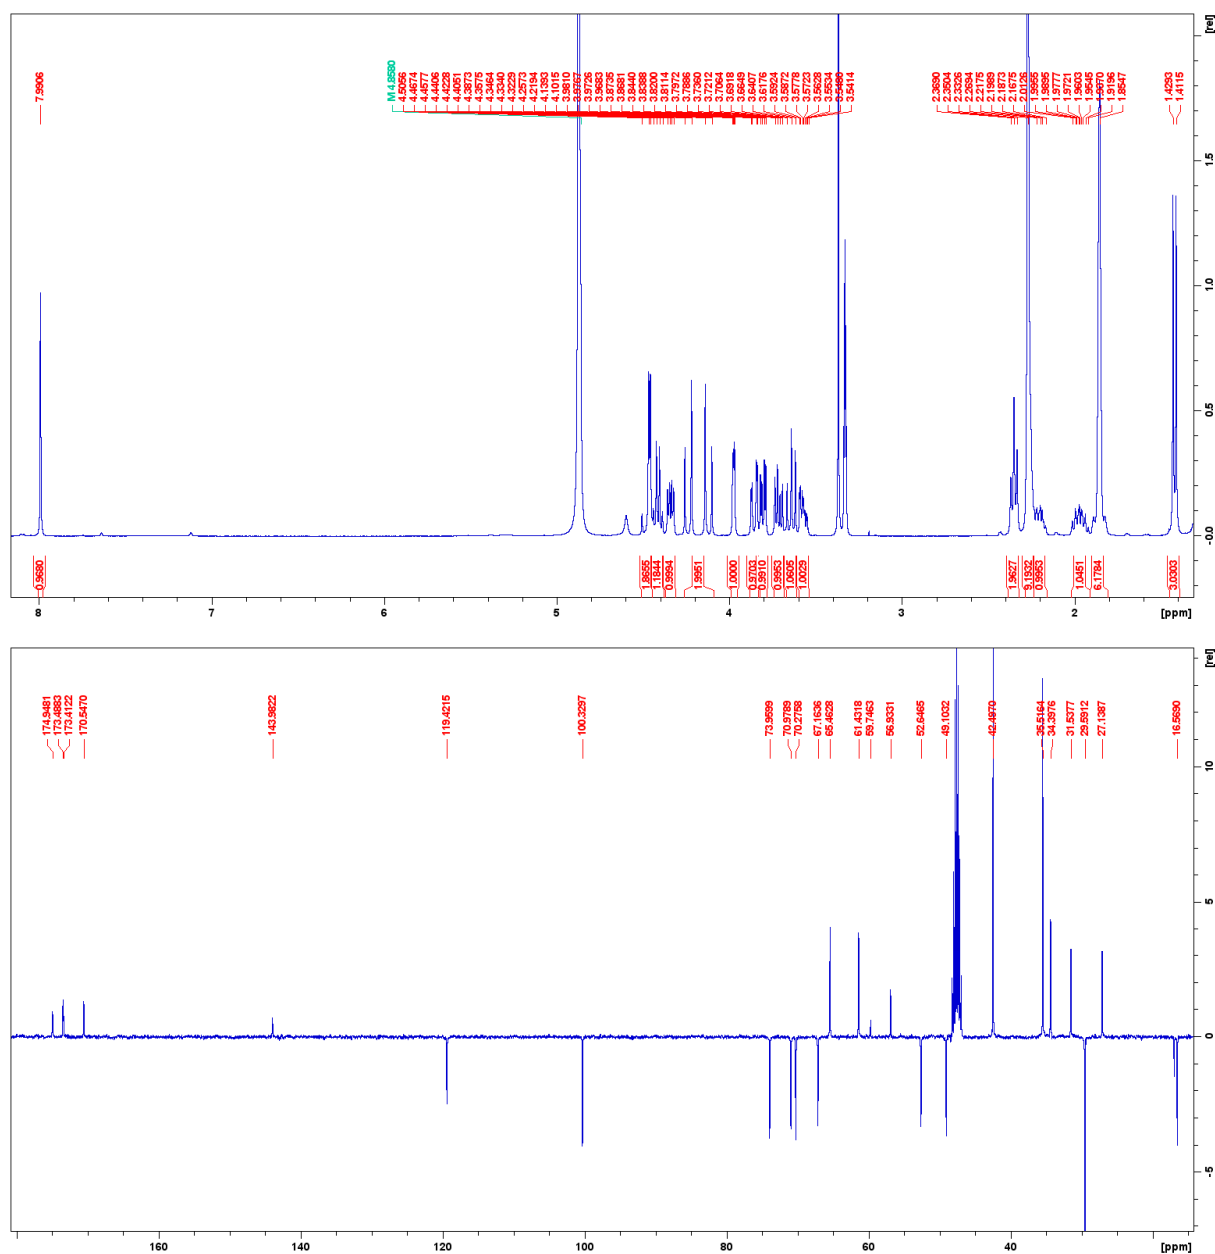

Figure S16. NMR spectra of compound 6a

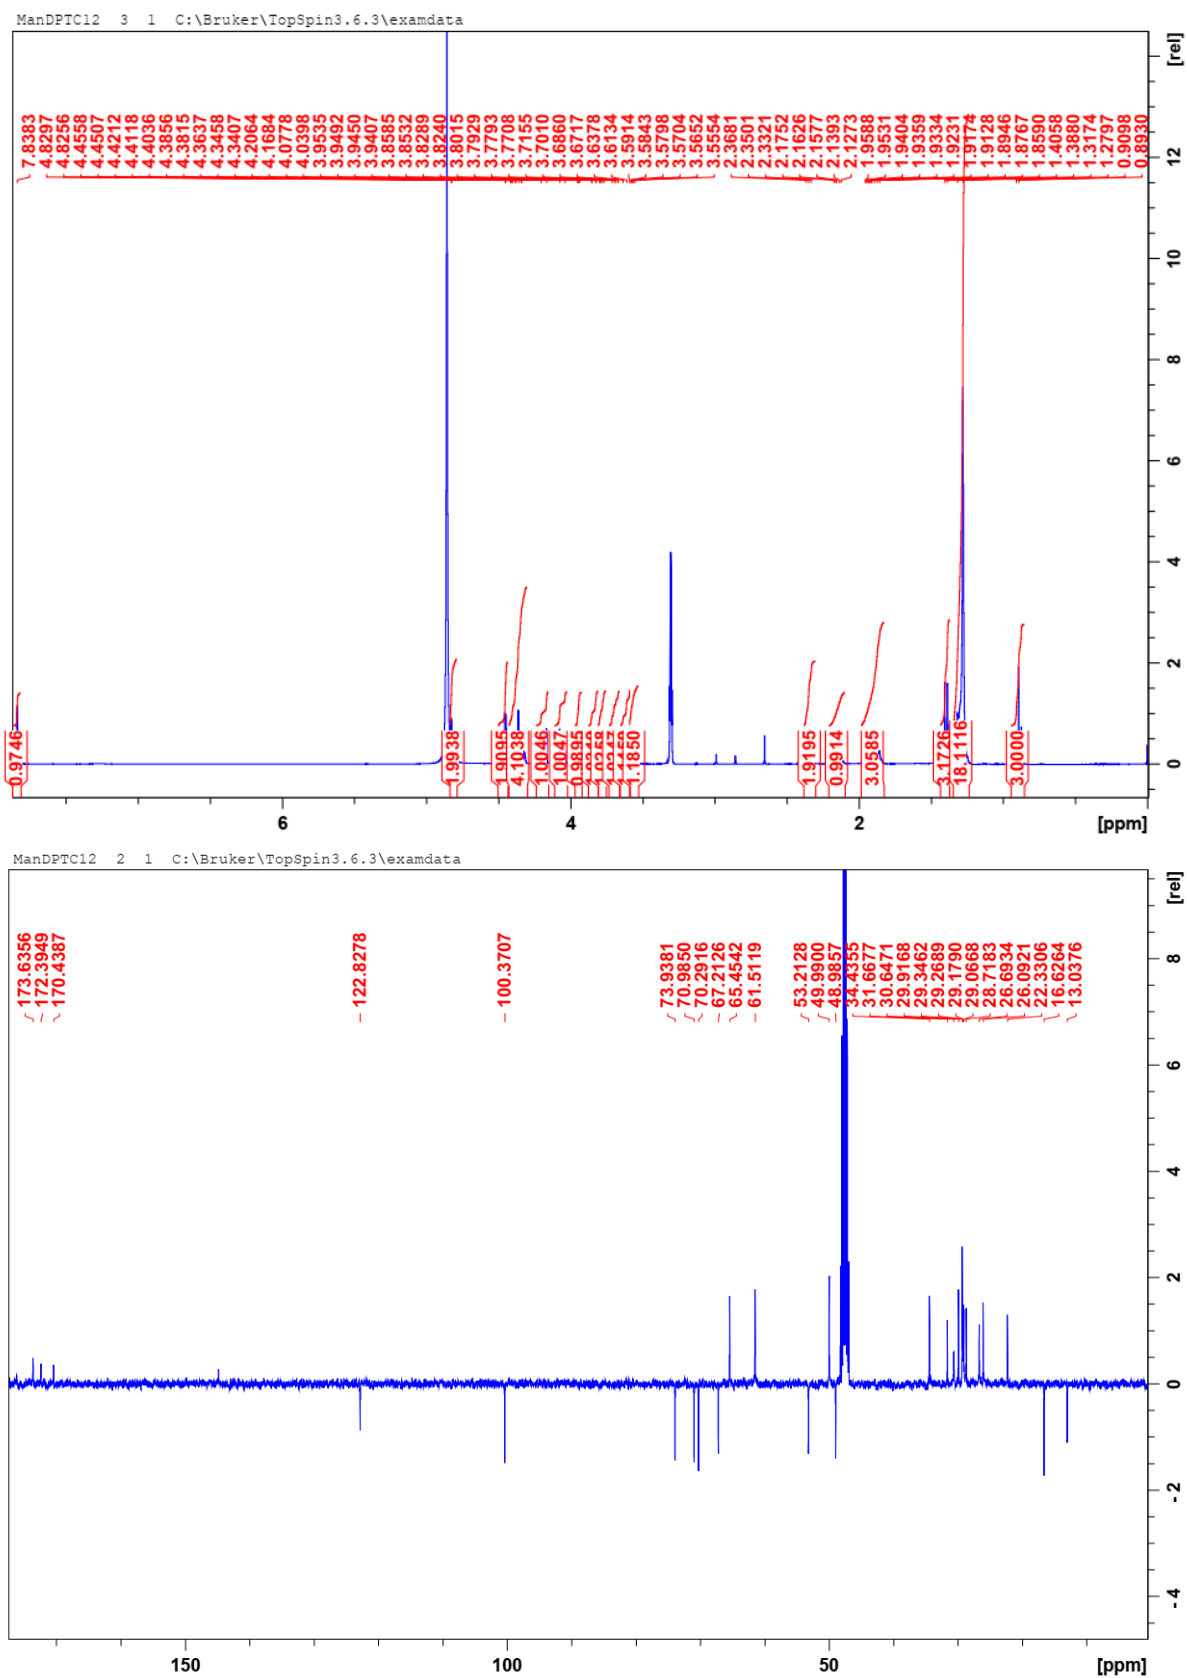

Figure S17. NMR spectra of compound **6b**

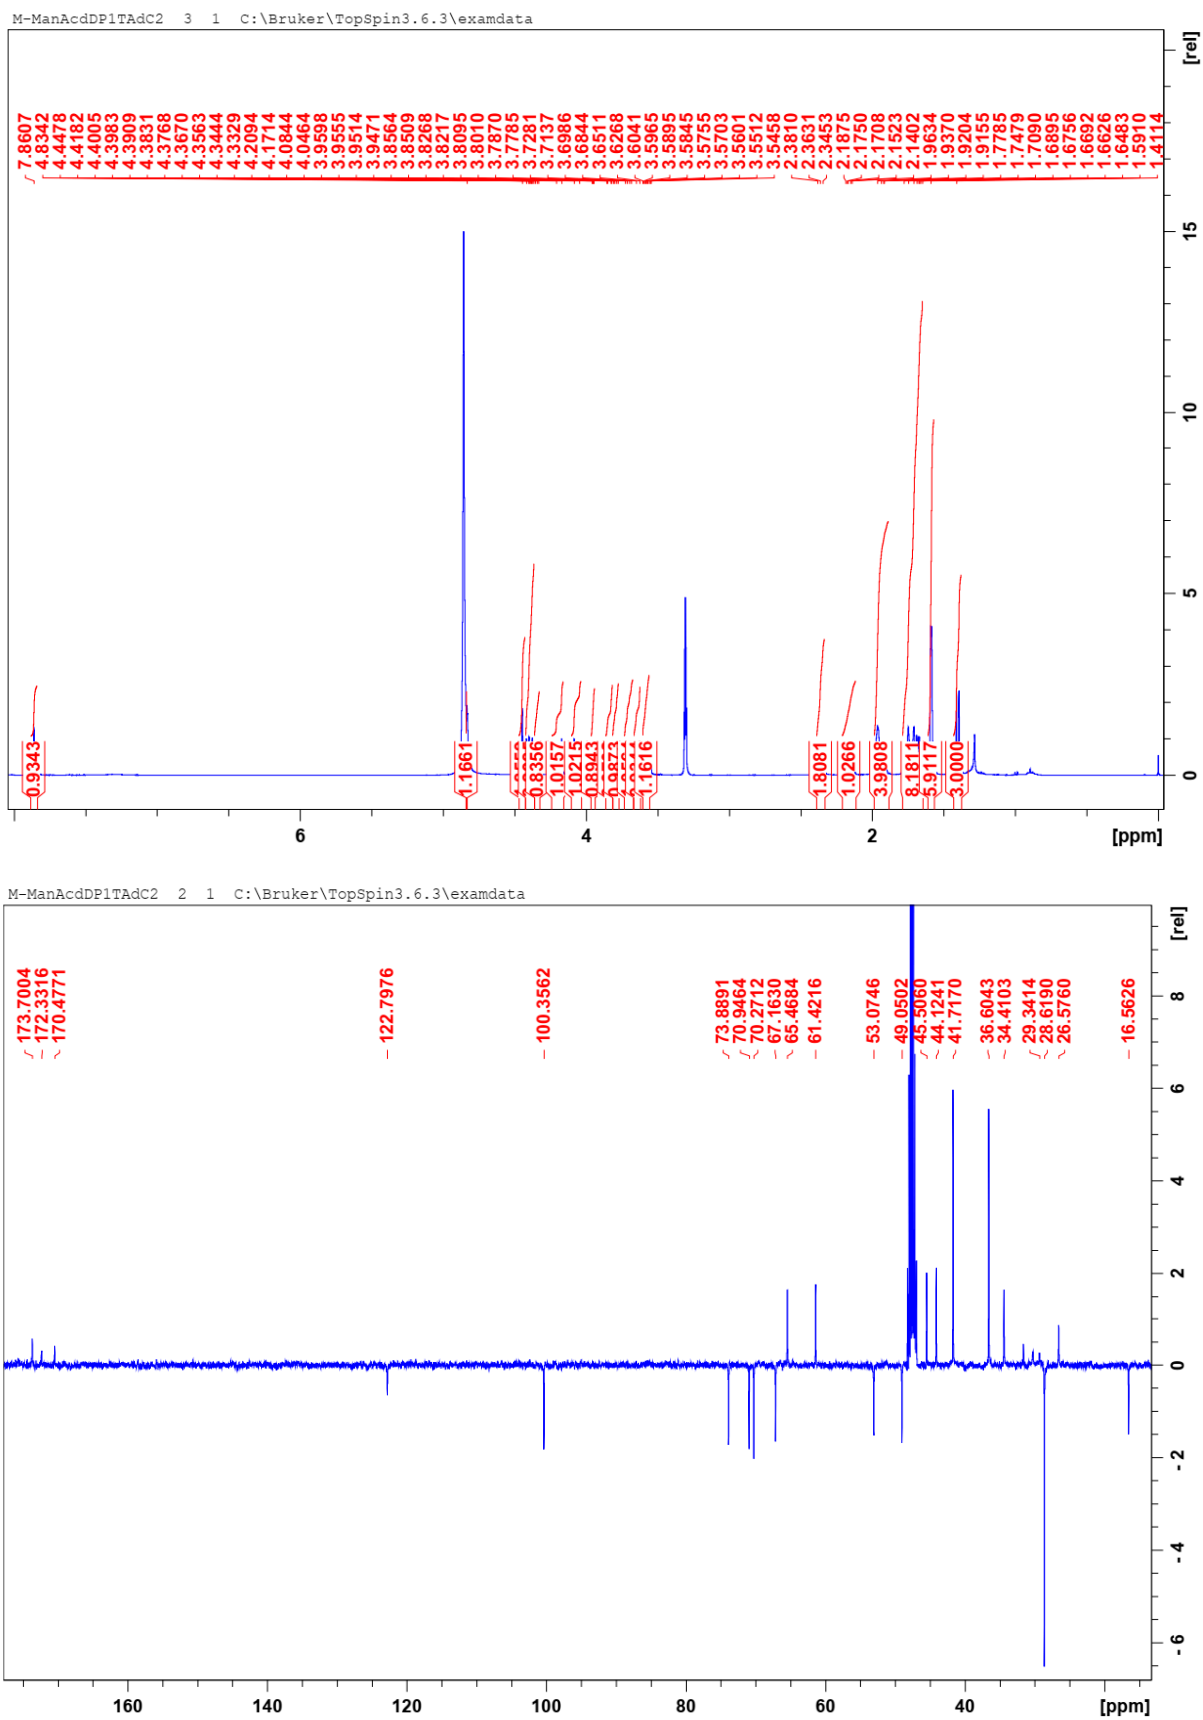

Figure S18. NMR spectra of compound 6c

Table S1. Binding energy scores of synthesized DMPs.

| <b>Compound</b>  | <b>Dock Score (kcal/mol)</b> |
|------------------|------------------------------|
| <b>ManDMPTAd</b> | -8.2                         |
| <b>6b</b>        | -6.7                         |
| <b>6c</b>        | -8.0                         |
